# Supplementary material for: Upconverting temperature sensors with high activation energy and low pump threshold
Source: Royal Society of Chemistry journal article supplement (doi:10.1039/d3nj00697b), 2023-01-01
Supplement: d3nj00697b1.pdf [file d3nj00697b1.pdf]

## Upconverting temperature sensors with high activation energy and low pump threshold

Manisha Prasad and Vineet Kumar Rai\*

Laser and Spectroscopy Laboratory

Department of Physics

Indian Institute of Technology (Indian School of Mines)

Dhanbad-826004, Jharkhand, India

---

\* Corresponding Author:

Email address: [vineetkrrai@yahoo.co.in](mailto:vineetkrrai@yahoo.co.in); [vineetkrrai@iitism.ac.in](mailto:vineetkrrai@iitism.ac.in)

Phone no.:+91-326-223 5404/5282

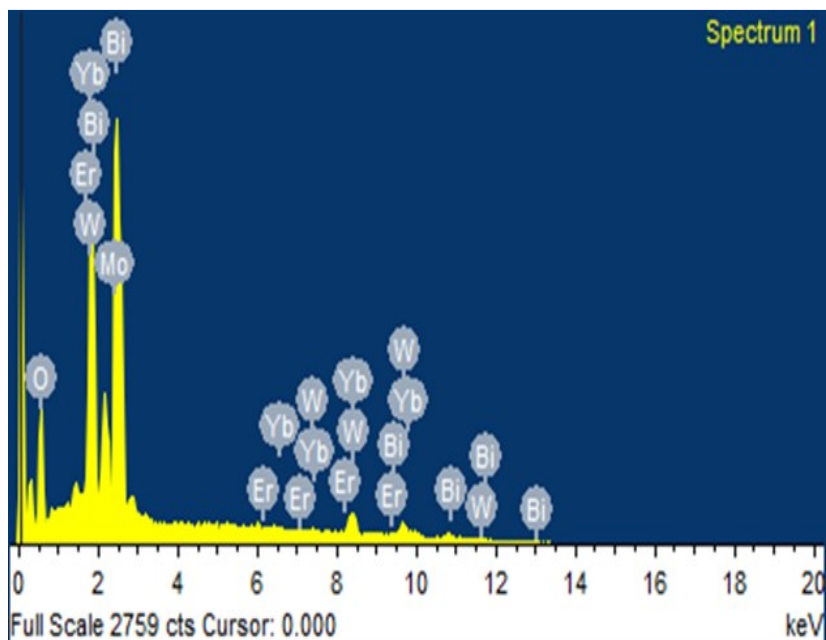

Fig S1. EDX spectra of  $\text{Er}^{3+}/\text{Yb}^{3+}/\text{Mo}^{6+}:\text{Bi}_2\text{WO}_6$  phosphor

The atomic % of dopants in  $\text{Bi}_2\text{WO}_6$  phosphor have been obtained by EDX instrument given in the table S1. The concentration of Mo is too small and therefore have not been calculated by the instrument.

Table S1: Elements and atomic% present in the codoped  $\text{Bi}_2\text{WO}_6$  phosphor

| Element | Atomic% |
|---------|---------|
| O K     | 75.44   |
| Er M    | 0.15    |
| Yb M    | 0.15    |
| W M     | 12.67   |
| Bi M    | 20.95   |

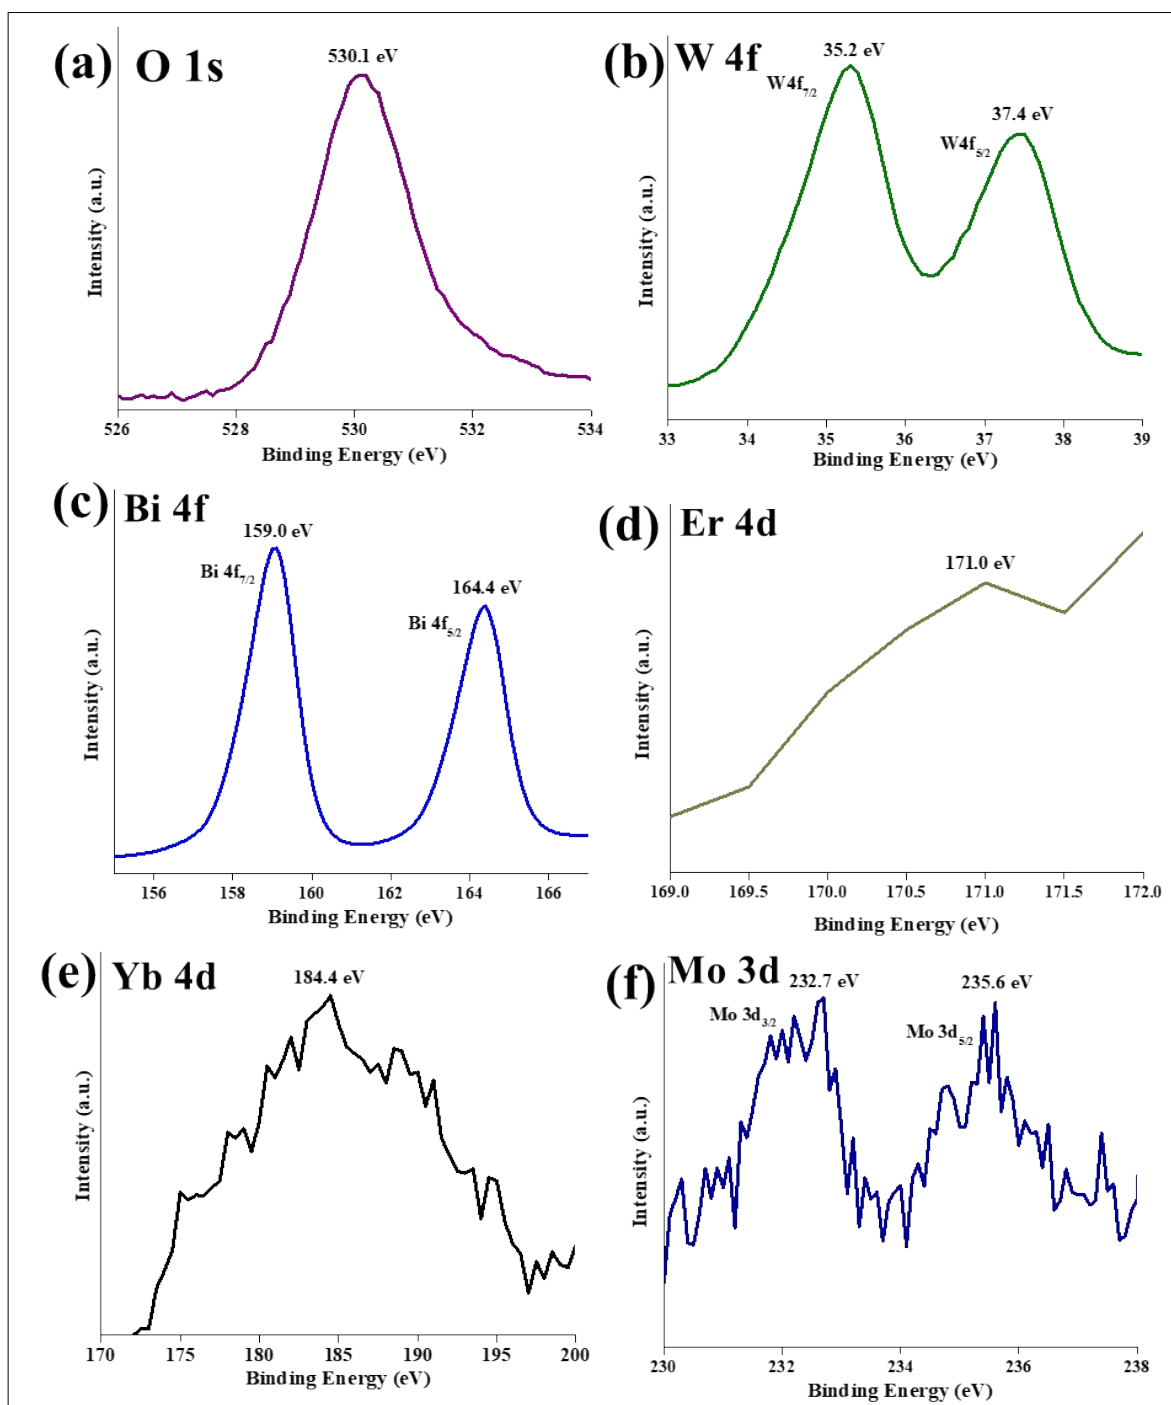

**Fig. S2.** High resolution XPS scan of (a) O 1s (b) W 4f (c) Bi 4f (d) Er 4d (e) Yb 4d and (f) Mo 3d.

The atomic % of dopants in  $\text{Bi}_2\text{WO}_6$  phosphor have been obtained by XPS instrument (survey scan) given in the table S2.

Table S2: Elements and atomic% present in the codoped  $\text{Bi}_2\text{WO}_6$  phosphor

| Element | Atomic% |
|---------|---------|
| O 1s    | 58.6    |
| Bi 4f   | 18.7    |
| W 4f    | 15.5    |
| Yb 4d   | 6.0     |

|       |       |
|-------|-------|
| Er 4d | 1.1   |
| Mo 3d | < 0.1 |

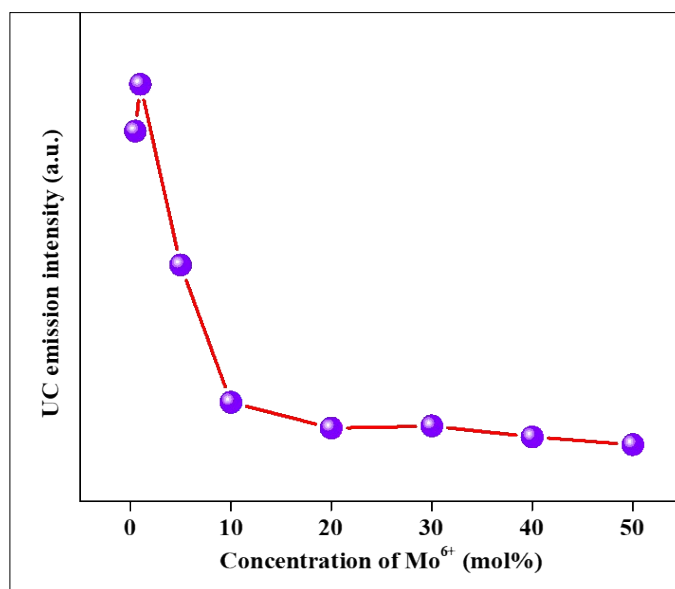

**Fig.S3.** UC emission integrated area for different concentration of Mo<sup>6+</sup> ions.

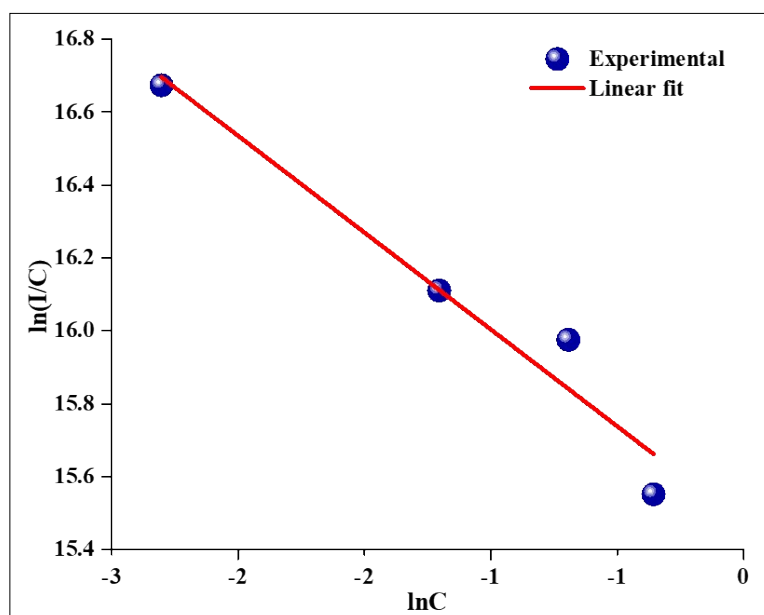

**Fig.S4.** The relationship of ln(I/C) with ln(C) for the Er<sup>3+</sup> doped Bi<sub>2</sub>WO<sub>6</sub> phosphors.

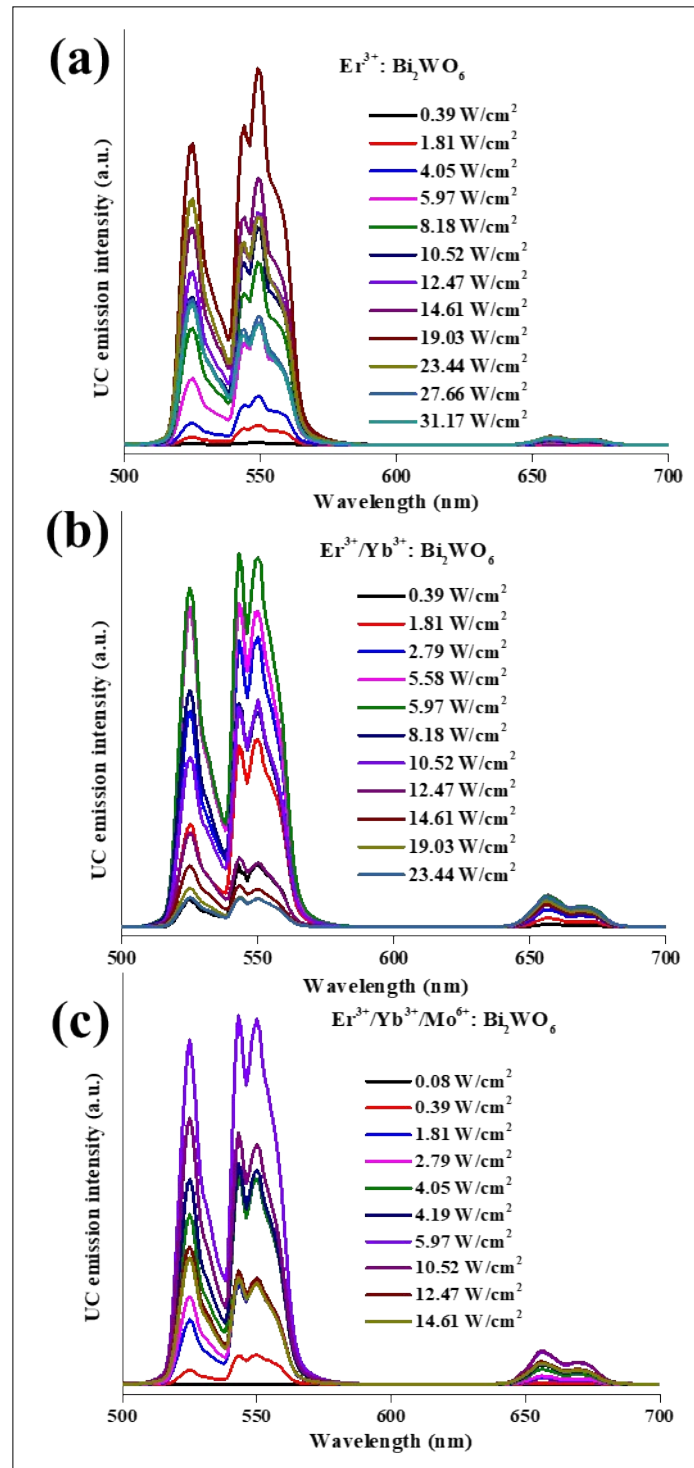

**Fig.S5.** The pump power density dependent UC emission intensity upon 980 nm excitation of the  $\text{Er}^{3+}$ ,  $\text{Er}^{3+}/\text{Yb}^{3+}$  and  $\text{Er}^{3+}/\text{Yb}^{3+}/\text{Mo}^{6+} : \text{Bi}_2\text{WO}_6$  phosphor.
